# Supplementary material for: MicroRNA-574-3p, identified by microRNA library-based functional screening, modulates tamoxifen response in breast cancer
Source: PubMed Central journal article supplement (PMC4284514; doi:10.1038/srep07641), 2015-01-06
Supplement: srep07641-s1.pdf [file srep07641-s1.pdf]

**MicroRNA-574-3p, identified by microRNA library-based functional screening,  
modulates tamoxifen response in breast cancer**

T Ujihira, K Ikeda, T Suzuki, R Yamaga, W Sato, K Horie-Inoue, T Shigekawa, A Osaki, T Saeki,  
K Okamoto, S Takeda, S Inoue

Supplementary Figures

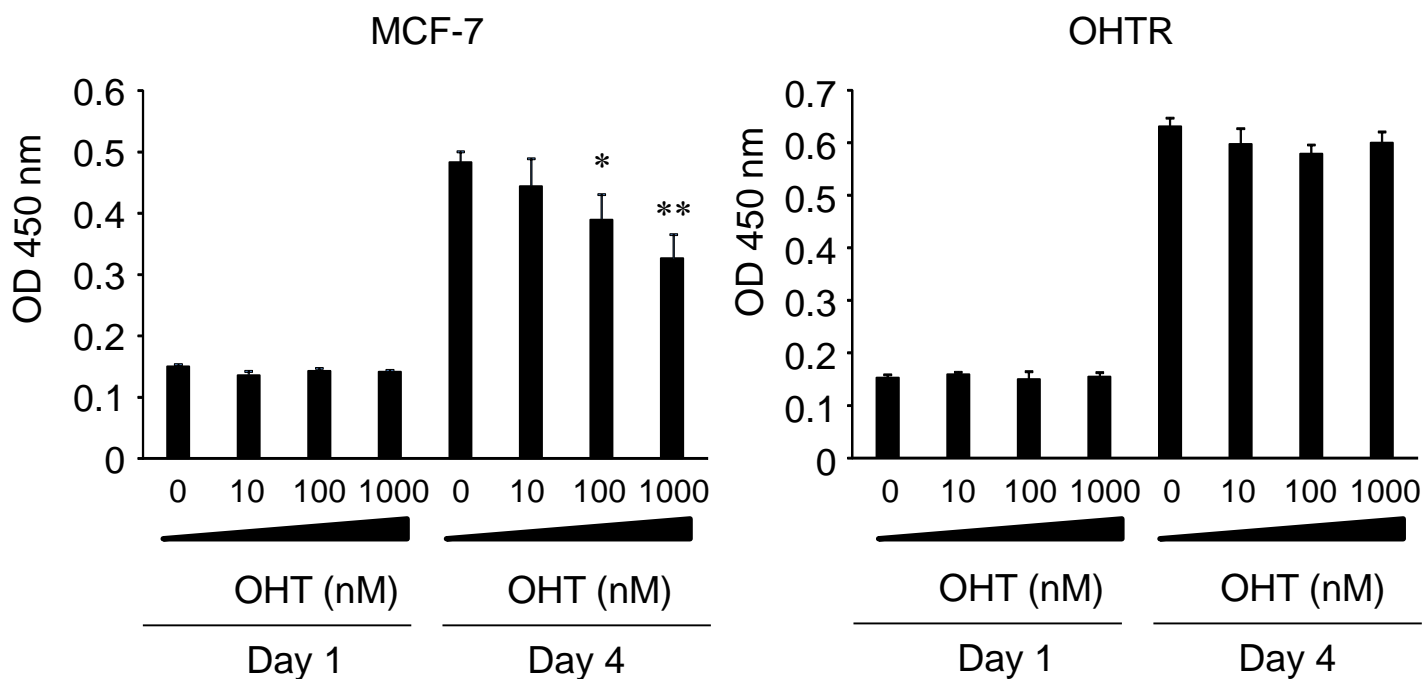

**Supplementary Figure S1.** Effects of tamoxifen on growth in MCF-7 and OHTR cells used. MCF-7 and OHTR cells were treated with 4-hydroxytamoxifen (OHT) at indicated concentrations. WST-8 cell proliferation assays were performed at the indicated time points. The absorbance values were measured using a microplate reader at 490 nm. Data are presented as mean  $\pm$  s.d. ( $n = 3$ ; \*,  $P < 0.05$ ; \*\*,  $P < 0.01$ ).

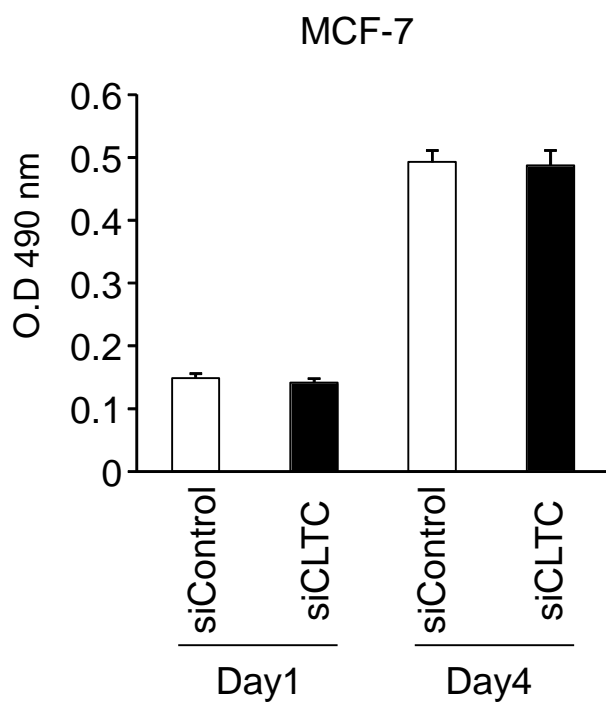

**Supplementary Figure S2.** Effects of siRNA targeting CLTC (siCLTC) on growth in MCF-7 in the basal condition. MCF-7 cells were transfected with siCLTC for 12 h (day 1) and then cultured in the medium without OHT. WST-8 cell proliferation assays were performed at the indicated time points. The absorbance values were measured using a microplate reader at 490 nm. Data are presented as mean  $\pm$  s.d. (n = 3; \*,  $P < 0.05$ ; \*\*,  $P < 0.01$ ).

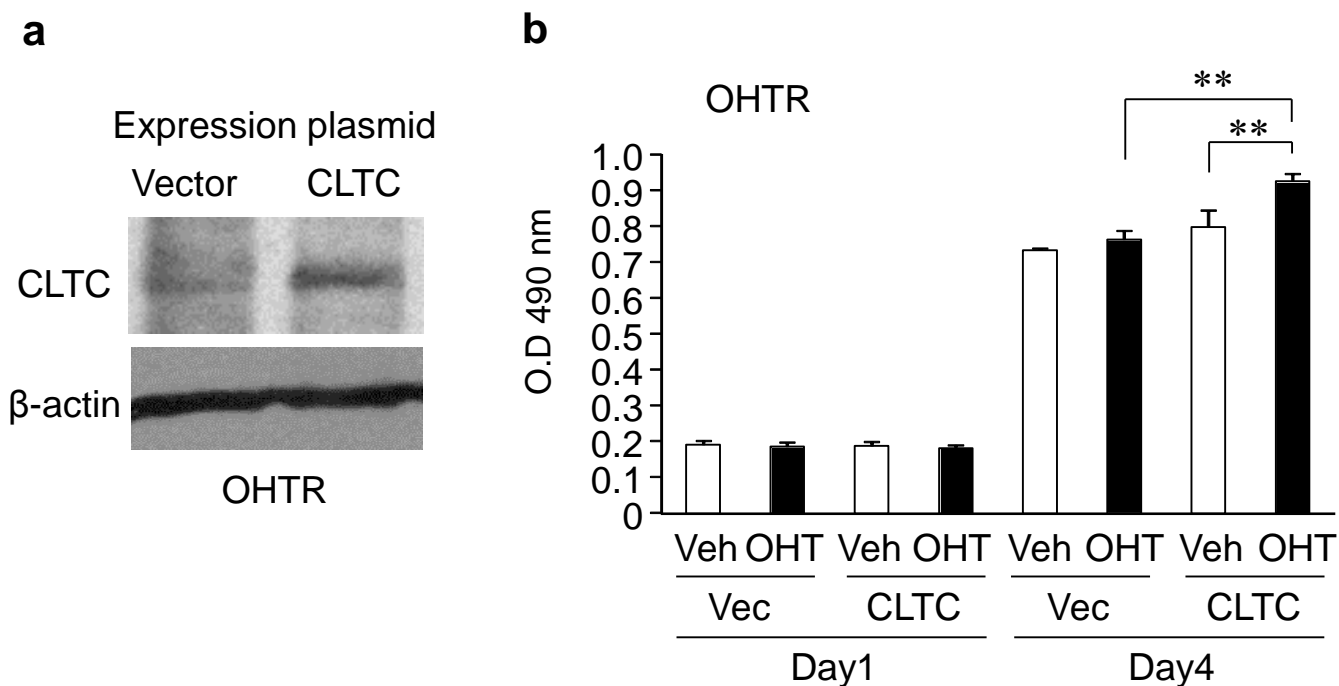

**Supplementary Figure S3.** Overexpression of CLTC stimulates growth of OHTR cells in the presence of tamoxifen. **(a)** Ectopic expression of CLTC in OHTR cells. OHTR cells were transfected with an expression plasmid for CLTC or empty vector for 48 h. Cell extracts were subjected to SDS-PAGE and western blot analysis using the CLTC and  $\beta$ -actin antibodies. **(b)** WST-8 cell growth assay of CLTC-transfected OHTR cells in the presence of tamoxifen. OHTR cells were transfected with an expression plasmid for CLTC or empty vector (vec) for 12 h (day 1) and then cultured in the medium containing  $10^{-6}$  M OHT (OHT) or vehicle (veh). WST-8 cell proliferation assays were performed at the indicated time points. The absorbance values were measured using a microplate reader at 490 nm. Data are presented as mean  $\pm$  s.d. ( $n = 3$ ; \*\*,  $P < 0.01$ ).
